# Supplementary material
Source: publisher figshare collection journal article supplement (https://acs.figshare.com/ndownloader/files/3775249)
Supplement: Supplementary file 1 [file 3775249]

# **Supporting Information: Direct Observation of Transient Surface Species during Ge Nanowire Growth and their Influence on Growth Stability**

**Authors:** Saujan V. Sivaram, Naechul Shin, Li-Wei Chou, Michael A. Filler\*

**Affiliation:** School of Chemical & Biomolecular Engineering, Georgia Institute of Technology,  
Atlanta, GA 30332, USA.

|               |    |
|---------------|----|
| Kinetic Model | S2 |
| Figures S1-S7 | S4 |

## Kinetic Model:

We utilize a heterogeneous  $\text{Ge}_2\text{H}_6$  decomposition mechanism that begins with the dual-site chemisorption reported by Chabal *et al.*:<sup>43</sup>

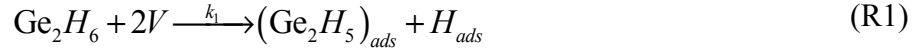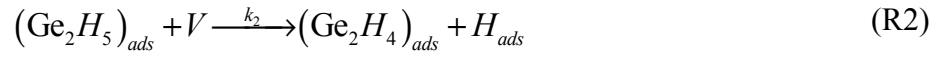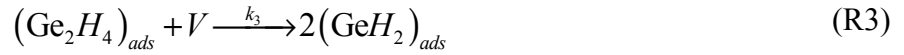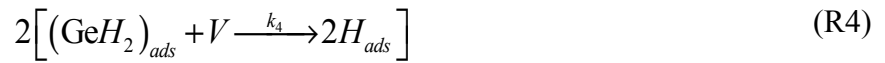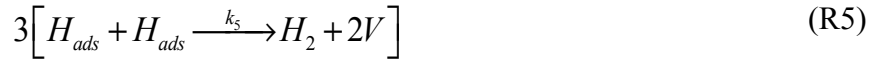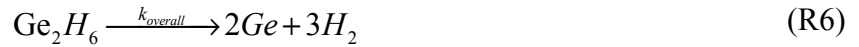

Here, ‘V’ refers to a vacant surface site. The surface site balance for this situation is:

$$1 = \theta_V + \theta_H + \theta_{\text{GeH}_2} + \theta_{\text{Ge}_2\text{H}_4} + \theta_{\text{Ge}_2\text{H}_5} \quad (\text{S1})$$

where  $\theta_j$  ( $j = \text{V}, \text{H}, \text{GeH}_2, \text{Ge}_2\text{H}_4, \text{or } \text{Ge}_2\text{H}_5$ ) refers to the surface coverage of each species (i.e., surface sites occupied by species  $j$  divided by total number of surface sites). The coverage of vacant surface sites is  $\theta_V$ . Since only monohydrides are observed in our spectra, as expected for the conditions examined here,<sup>24,43</sup> we know that  $k_2, k_3, k_4 \gg k_5$ . The surface hydrogen atom coverage,  $\theta_H$ , at steady-state is therefore determined by a competition between  $\text{Ge}_2\text{H}_6$  adsorption (R1) and  $\text{H}_2$  desorption (R5):

$$\frac{d\theta_H}{dt} = 0 = k_1 \theta_V^2 p_{\text{Ge}_2\text{H}_6} - 2k_5 \theta_H \quad (\text{S2})$$

where  $k_1$  and  $k_5$  are the rate constants for R1 and R5, respectively, and  $p_{\text{Ge}_2\text{H}_6}$  is the partial pressure of  $\text{Ge}_2\text{H}_6$ . Temperature-programmed desorption experiments indicate that desorption is first-order with respect to  $\theta_H$  on Ge(100) surfaces.<sup>22</sup> The site balance simplifies to:

$$1 = \theta_V + \theta_H \quad (S3)$$

Solving for  $\theta_V$  in Equation S3 and substituting in Equation S2, we obtain the following expression:

$$\frac{d\theta_H}{dt} = 0 = k_1(1 - \theta_H)^2 p_{Ge_2H_6} - 2k_5\theta_H \quad (S4)$$

Rearranging and assuming  $k_1$  and  $k_5$  exhibit an Arrhenius dependence, we obtain:

$$\frac{(1 - \theta_H)^2}{\theta_H} = \frac{2k_5}{k_1 p_{Ge_2H_6}} = \frac{2k_{5,o}}{k_{1,o} p_{Ge_2H_6}} e^{\frac{E_1 - E_5}{RT}} = \frac{\beta}{p_{Ge_2H_6}} e^{\frac{E_{net}}{RT}} \quad (S5)$$

where  $k_{1,o}$ ,  $E_1$  and  $k_{5,o}$ ,  $E_5$  are the pre-exponential factors and activation energies for the rate

constants  $k_1$  and  $k_5$ , respectively. Here,  $\beta = \frac{2k_{5,o}}{k_{1,o}}$  and  $E_{net} = E_1 - E_5$ . We fit our experimental

values for  $\theta_H$  to this kinetic model by linearizing Equation S5 to yield:

$$\ln\left(\frac{(1 - \theta_H)^2}{\theta_H}\right) = \ln\left(\frac{\beta}{p_{Ge_2H_6}}\right) + \frac{E_{net}}{RT} \quad (S6)$$

and plotting the left hand side of Equation S6 with respect to  $T^{-1}$ . Since  $k_1$  and  $k_5$  differ by crystal facet,<sup>23,27</sup> we find approximate values for  $E_{net}$  and  $\beta$  by fitting our  $\theta_H$  values, even at different  $Ge_2H_6$  partial pressures, simultaneously. As seen in Figure 7, the functional form is consistent with our experimental data.

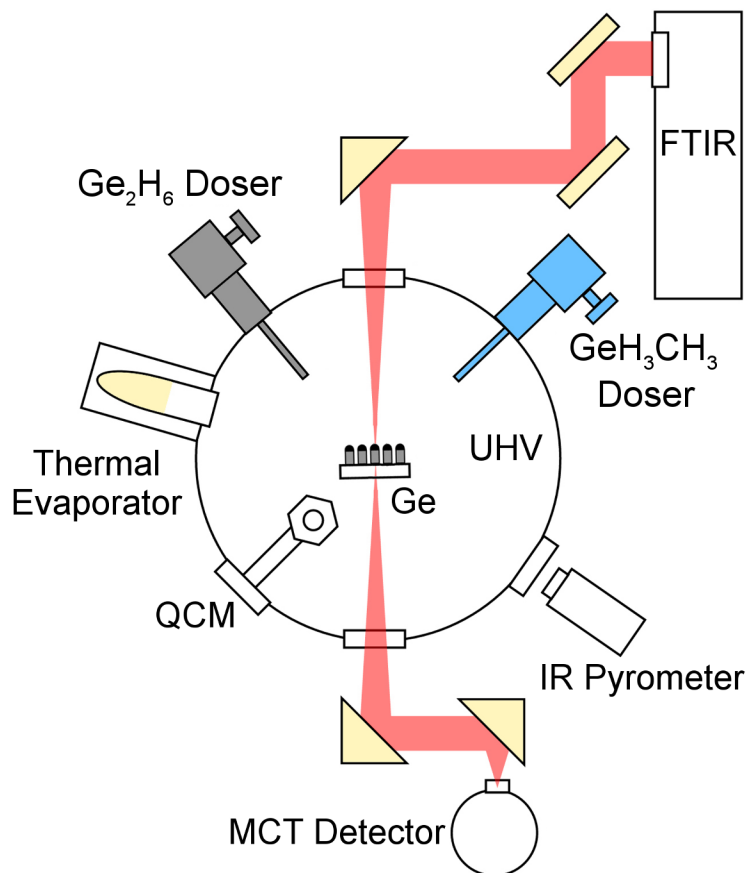

**Figure S1. Experimental setup.** Schematic of ultrahigh vacuum chamber (UHV) coupled with *in situ* transmission infrared spectroscopy. The infrared beam path is shown in red. As seen in the schematic, the substrate is oriented perpendicular to the beam path for the nanowire *operando* and *saturation* measurements. During Au deposition the substrate is oriented perpendicular to the thermal evaporator. Film thickness is measured with a quartz crystal microbalance (QCM). Temperature is measured with an infrared (IR) pyrometer focused on the backside of the Ge substrate.  $\text{Ge}_2\text{H}_6$  is introduced through the leak valve and doser combination shown in gray, while  $\text{GeH}_3\text{CH}_3$  is added through that shown in blue.

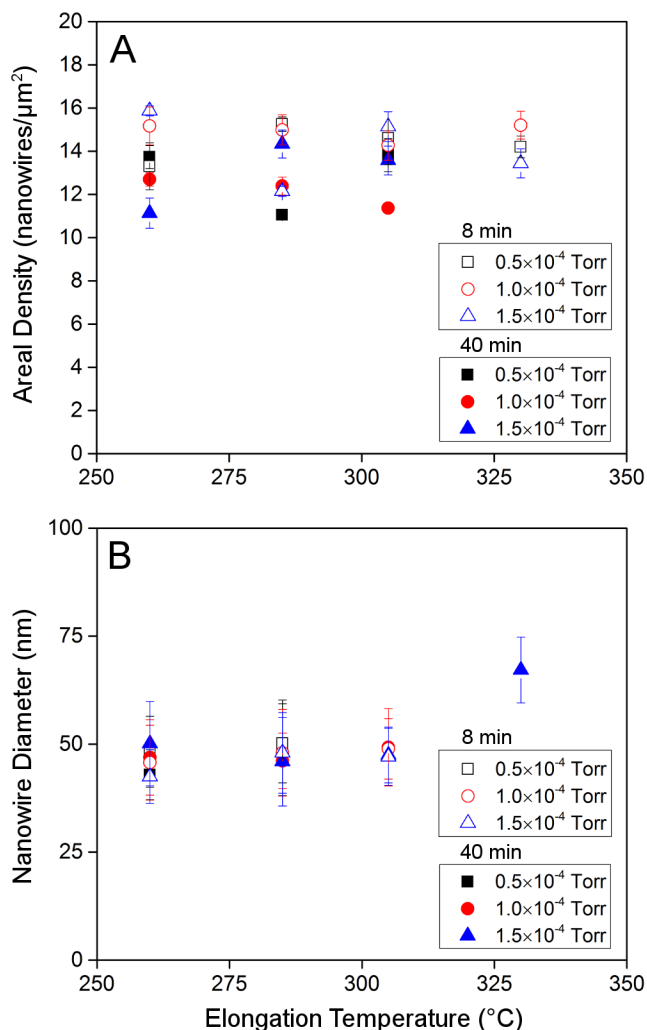

**Figure S2. Nanowire statistics.** Average (A) array areal densities ( $\rho$ ) and (B) nanowire diameters as a function of  $T_{\text{sub}}$  and  $p_{\text{Ge}_2\text{H}_6}$ . Areal densities calculated from plan view SEM images ( $4.57 \mu\text{m} \times 3.26 \mu\text{m}$ ) taken at three different locations within  $\sim 10 \mu\text{m}$  from the substrate center. Diameter of 50 nanowires per growth condition, measured at the liquid-solid interface. Due to limited vertical yield, only 25 nanowires are sampled for  $T_{\text{sub}} = 330 ^{\circ}\text{C}$  and  $p_{\text{Ge}_2\text{H}_6} = 1 \times 10^{-4}$  Torr. Vertical nanowire growth is not obtained for  $T_{\text{sub}} = 330 ^{\circ}\text{C}$  and  $p_{\text{Ge}_2\text{H}_6} = 0.5 - 1 \times 10^{-4}$  Torr (see Figure 2).

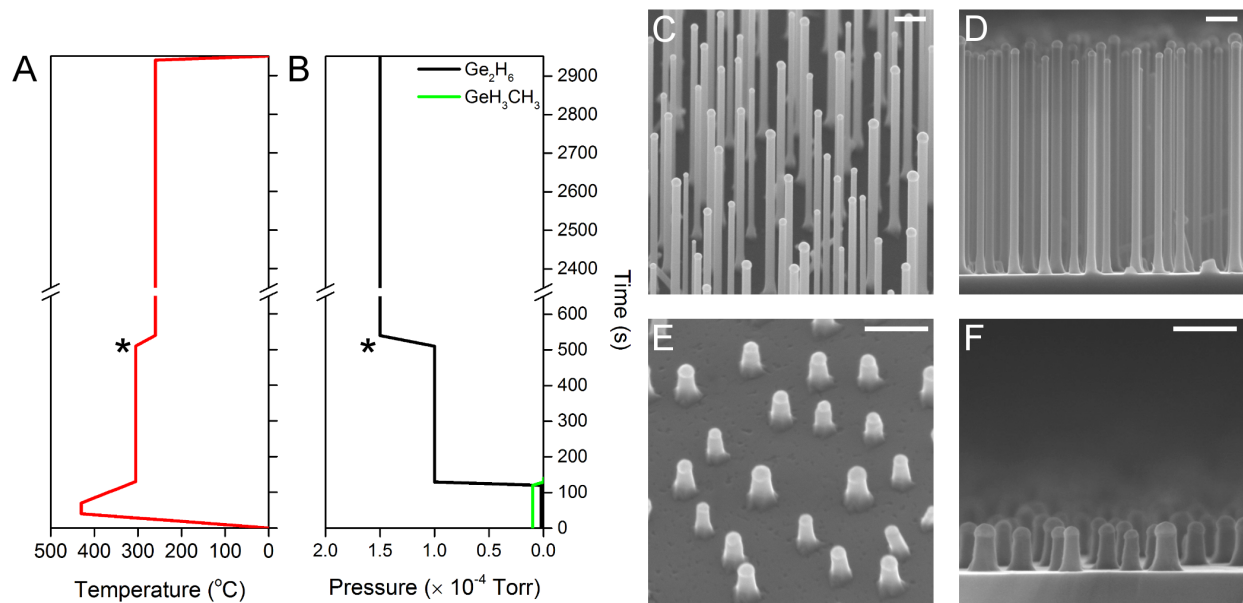

**Figure S3. Nanowire synthesis protocol.** Schematic plots of (A) substrate temperature ( $T_{\text{sub}}$ ) and (B) precursor partial pressures ( $p_{\text{Ge}_2\text{H}_6}$  and  $p_{\text{GeH}_3\text{CH}_3}$ ) versus time for a typical nanowire synthesis. The procedure consists of an “incubation” step, which is the same for all nanowire growths, and subsequent “elongation” at a  $T_{\text{sub}}$  and  $p_{\text{Ge}_2\text{H}_6}$  of interest. The transition between incubation and elongation is denoted with ‘\*’. Representative (C) 45° and (D) side-view SEM images of a nanowire array elongated for 40 minutes at  $T_{\text{sub}} = 260$  °C and  $p_{\text{Ge}_2\text{H}_6} = 1.5 \times 10^{-4}$  Torr. Terminating growth immediately after incubation yields ~100 nm long nanowires as shown in the (E) 45° and (F) side-view SEM images. Scale bars, 200 nm.

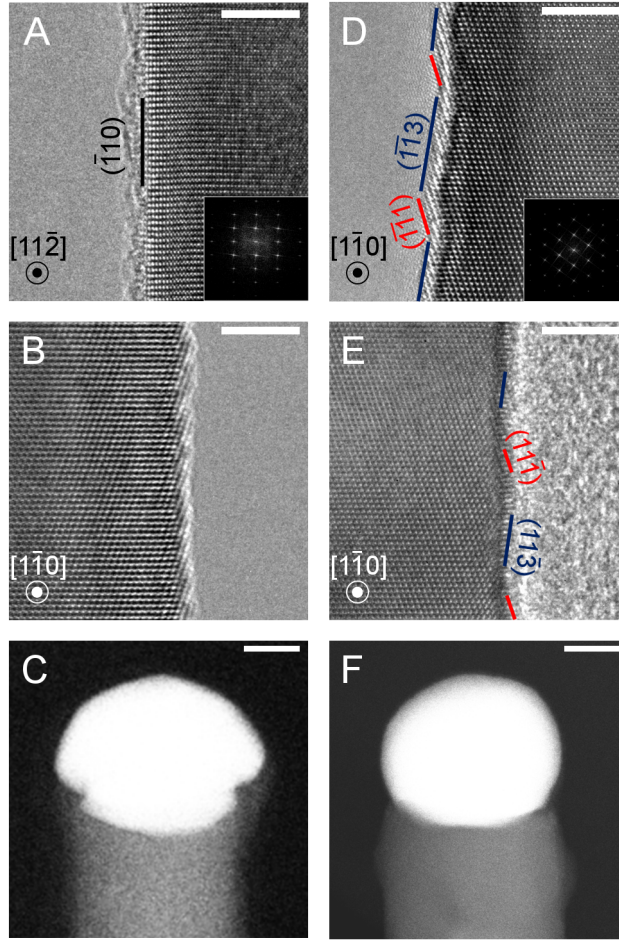

**Figure S4. TEM analysis of tapered and untapered nanowires.** Bright field high resolution TEM image of a representative Ge nanowire grown at  $T_{\text{sub}} = 260$  °C and  $p_{\text{Ge}_2\text{H}_6} = 1 \times 10^{-4}$  Torr along the (A)  $[11\bar{2}]$  and (B)  $[1 \bar{1}0]$  zone axes. Scale bars, 5 nm. (C) Dark field STEM image of the nanowire imaged in (A,B). Scale bar, 10 nm. Bright field high resolution TEM image of a representative Ge nanowire grown at  $T_{\text{sub}} = 305$  °C and  $p_{\text{Ge}_2\text{H}_6} = 1 \times 10^{-4}$  Torr along the (D)  $[11\bar{2}]$  and (E)  $[1 \bar{1}0]$  zone axes. Scale bars, 5 nm. (F) Dark field STEM image of the nanowire imaged in (D,E). Scale bar, 10 nm.

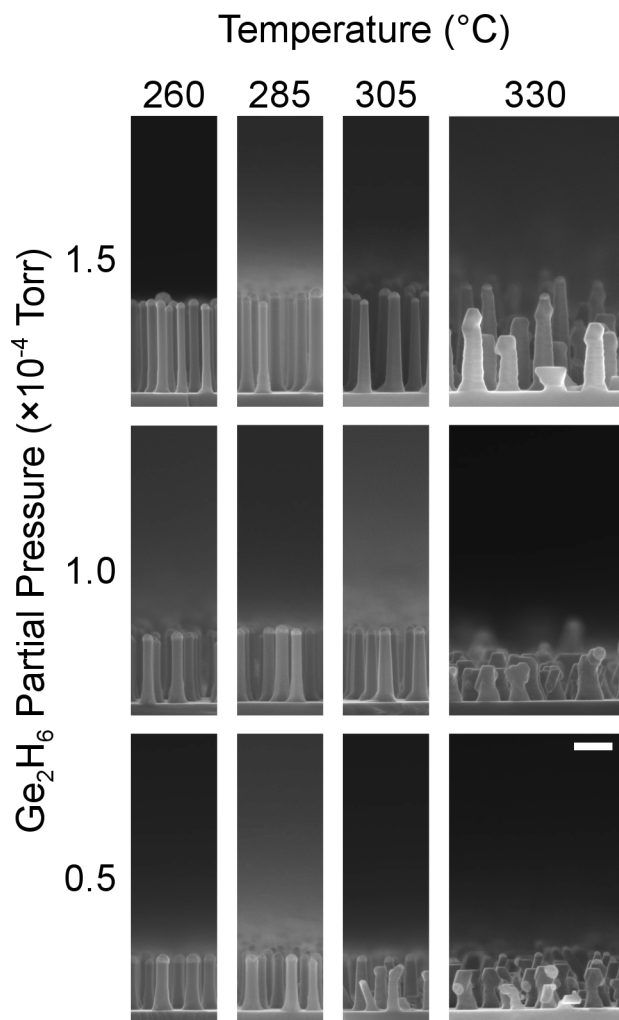

**Figure S5. Nanowire morphology after elongation for 8 minutes.** Representative side-view SEM images showing Ge nanowire morphology as a function of  $T_{\text{sub}}$  and  $p_{\text{Ge}_2\text{H}_6}$  after elongation for 8 minutes. Scale bar, 200 nm.



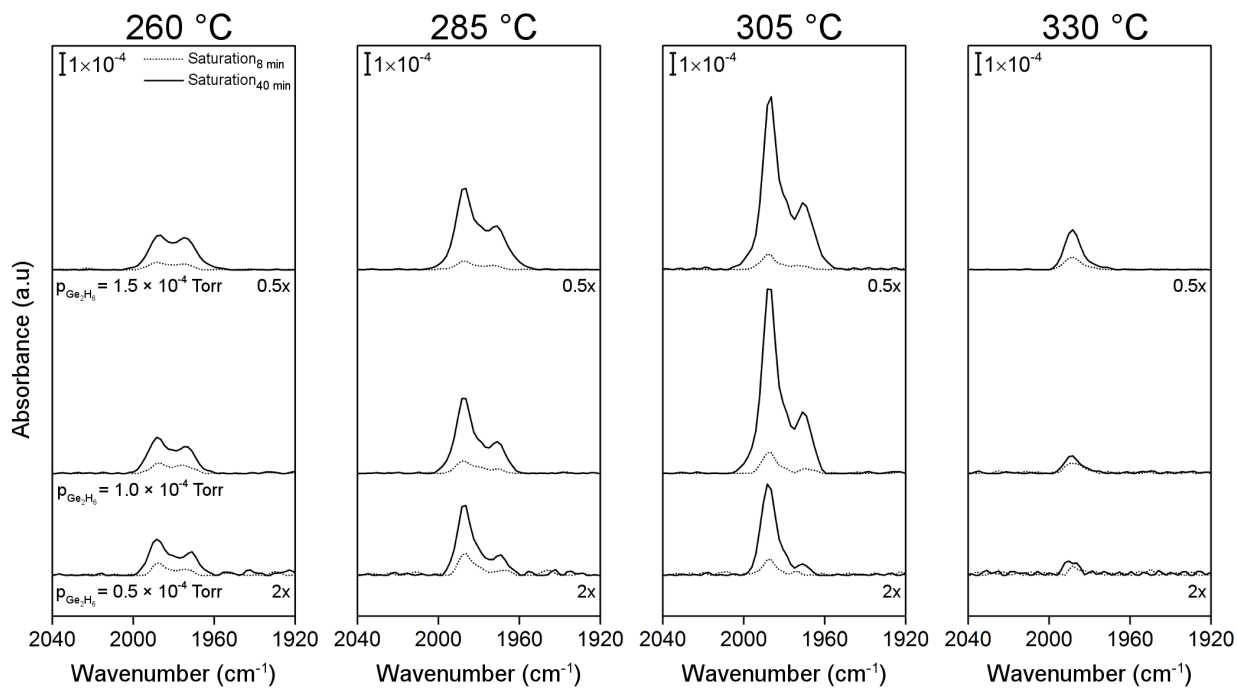

**Figure S6. Comparison of post-growth saturation spectra.**  $A_{\text{saturation}_{40\text{min}}}(\tilde{\nu})$  (solid) and  $A_{\text{saturation}_{8\text{min}}}(\tilde{\nu})$  (dotted) infrared absorption spectra recorded after 40 and 8 minute nanowire elongations, respectively, at the indicated  $T_{\text{sub}}$  and  $p_{\text{Ge}_2\text{H}_6}$ . Spectra for  $p_{\text{Ge}_2\text{H}_6} = 0.5$  and  $1.5 \times 10^{-4}$  Torr are scaled by a factor of 2 and 0.5, respectively, for ease of comparison. Background spectra are of the Au-covered Ge(111) substrate maintained at room temperature in vacuum immediately prior to nanowire growth. All spectra are recorded with the substrate oriented perpendicular to the beam path (see Figure 1A).

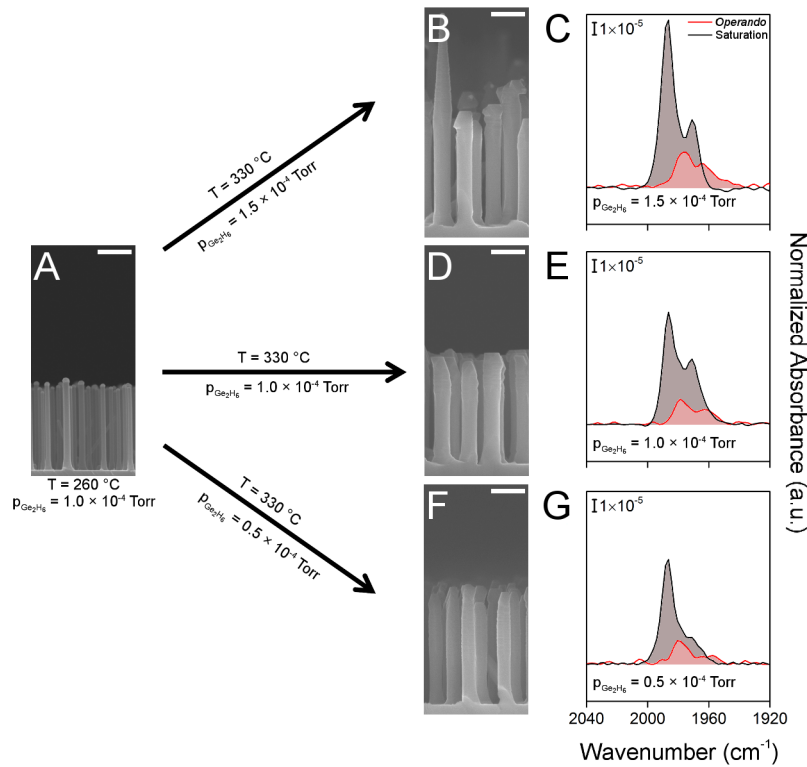

**Figure S7. High surface area experiments.** (A) Representative side-view SEM image of initial nanowire elongated for 40 minutes at  $T_{\text{sub}} = 260\text{ }^{\circ}\text{C}$  and  $p_{\text{Ge}_2\text{H}_6} = 1 \times 10^{-4}\text{ Torr}$ . (B, D, F) Representative side-view SEM images of nanowire arrays first grown as in (A) and then elongated for an additional 32 minutes at  $T_{\text{sub}} = 330\text{ }^{\circ}\text{C}$  and the indicated  $\text{Ge}_2\text{H}_6$  partial pressure. (C, E, G) Comparison of  $A_{\text{operando}}^{\text{norm}}(\tilde{\nu})$  (red) and  $A_{\text{saturation}}^{\text{norm}}(\tilde{\nu})$  (gray) for each condition shown in (B, D, F). All spectra are recorded with the substrate oriented perpendicular to the beam path (see Figure 1A).
